# Supplementary material for: Development of preconcentration strategies for the simultaneous ultratrace determination of As, Cd and Pb in foods by ICP-OES: knotted-reactor vs. dispersive liquid–liquid microextraction
Source: Royal Society of Chemistry journal article supplement (doi:10.1039/c9ja00427k), 2020-01-01

## Electronic supplementary information

**Table S1.** Cadmium and Pb signal response for CCD design using KR-ICP-OES.

ICP-OES operating conditions:  $Q_g$ : 0.7 L min<sup>-1</sup>;  $Q_i$ : 0.4 mL min<sup>-1</sup>. Analyte concentration: 1 mg L<sup>-1</sup>.

| pH | APDC concentration<br>(% w w <sup>-1</sup> ) | Reactor<br>length (cm) | Elution flow<br>(mL min <sup>-1</sup> ) | Integrated signal ·<br>10 <sup>3</sup> (counts) |          |
|----|----------------------------------------------|------------------------|-----------------------------------------|-------------------------------------------------|----------|
|    |                                              |                        |                                         | Cd                                              | Pb       |
| 3  | 0.27                                         | 100                    | 0.23                                    | 55±2                                            | 20.0±0.5 |
| 7  | 0.8                                          | 256                    | 0.23                                    | 268±2                                           | 25.0±0.5 |
| 5  | 0.54                                         | 178                    | 0.11                                    | 257±2                                           | 20.0±0.7 |
| 5  | 0.54                                         | 178                    | 0.34                                    | 113±1                                           | 17.0±0.6 |
| 5  | 0.54                                         | 178                    | 0.56                                    | 126±2                                           | 13.0±0.5 |
| 3  | 0.27                                         | 100                    | 0.45                                    | 165±1.7                                         | 20.0±0.8 |
| 5  | 0.54                                         | 334                    | 0.34                                    | 149±1.7                                         | 19.0±0.7 |
| 3  | 0.8                                          | 100                    | 0.45                                    | 165±2                                           | 25.0±1.2 |
| 3  | 0.8                                          | 100                    | 0.23                                    | 45±1.3                                          | 22.0±0.8 |
| 5  | 0.54                                         | 22                     | 0.34                                    | 31±1.0                                          | 17.0±0.7 |
| 7  | 0.8                                          | 100                    | 0.45                                    | 46±1.3                                          | 19.0±0.7 |
| 3  | 0.27                                         | 256                    | 0.23                                    | 103±2                                           | 14.0±0.6 |
| 5  | 1.07                                         | 178                    | 0.34                                    | 145±2                                           | 19.0±0.6 |
| 5  | 0.54                                         | 178                    | 0.34                                    | 113±3                                           | 17.0±0.7 |
| 9  | 0.54                                         | 178                    | 0.34                                    | 160±2                                           | 17.0±0.7 |
| 5  | 0.005                                        | 178                    | 0.34                                    | 83±1.5                                          | 12.0±0.5 |
| 7  | 0.27                                         | 100                    | 0.23                                    | 30.0±1.4                                        | 11.8±0.5 |
| 7  | 0.8                                          | 256                    | 0.45                                    | 63±3                                            | 20.0±0.7 |
| 7  | 0.27                                         | 256                    | 0.23                                    | 47±2                                            | 16.0±0.8 |
| 3  | 0.8                                          | 256                    | 0.23                                    | 25±6                                            | 42.0±0.2 |
| 3  | 0.27                                         | 256                    | 0.45                                    | 95±2                                            | 17.0±0.5 |
| 1  | 0.54                                         | 178                    | 0.34                                    | 170±6                                           | 28.0±0.8 |
| 7  | 0.27                                         | 256                    | 0.45                                    | 60±2                                            | 15.0±0.5 |
| 7  | 0.27                                         | 100                    | 0.45                                    | 38±1.8                                          | 14.8±0.3 |
| 7  | 0.8                                          | 100                    | 0.11                                    | 56±2                                            | 15.5±0.6 |

**Table S2.** As, Cd and Pb signal response for a CCD design using DLLME.  $Q_g$ : 0.7 L min<sup>-1</sup>;  $Q_i$ : 0.4 mL min<sup>-1</sup>; supramolecular/acetic acid dilution ratio: 1:0.5; analyte concentration: 1 mg L<sup>-1</sup>.

| pH | APDC                                    |                      | THF            | Integrated signal (counts) · 10 <sup>3</sup> |           |           |
|----|-----------------------------------------|----------------------|----------------|----------------------------------------------|-----------|-----------|
|    | concentration<br>(% w w <sup>-1</sup> ) | Alcohol<br>mass (mg) | volume<br>(mL) | As                                           | Cd        | Pb        |
| 3  | 0.1                                     | 80                   | 0.15           | 23.0±0.5                                     | 50.0±1.3  | 7.9±0.3   |
| 6  | 0.25                                    | 160                  | 0.025          | 13.0±0.3                                     | 190±7     | 8.7±0.5   |
| 9  | 0.4                                     | 80                   | 0.15           | 14.0±0.3                                     | 93.0±5    | 6.7±0.2   |
| 9  | 0.4                                     | 80                   | 0.4            | 27.0±0.6                                     | 170±9     | 10.5±0.2  |
| 3  | 0.4                                     | 80                   | 0.15           | 21.0±0.4                                     | 100±5     | 11.0±0.4  |
| 6  | 0.55                                    | 160                  | 0.275          | 20.0±0.5                                     | 300.0±1.0 | 22.0±0.8  |
| 12 | 0.25                                    | 160                  | 0.275          | 23.0±0.4                                     | 130±6     | 3.0±0.2   |
| 9  | 0.1                                     | 240                  | 0.4            | 25.0±0.6                                     | 110±4     | 14.0±0.2  |
| 9  | 0.4                                     | 240                  | 0.4            | 30.0±0.8                                     | 190±6     | 21.7±0.4  |
| 6  | 0.25                                    | 160                  | 0.275          | 23.0±0.7                                     | 260±9     | 20.2±0.2  |
| 0  | 0.25                                    | 160                  | 0.275          | 27.0±0.9                                     | 72±4      | 3.0±0.2   |
| 6  | 0.25                                    | 160                  | 0.275          | 20.0±0.7                                     | 260±9     | 18.0±0.6  |
| 3  | 0.4                                     | 240                  | 0.4            | 27.0±0.8                                     | 120±5     | 10.0±0.4  |
| 3  | 0.4                                     | 80                   | 0.4            | 31.0±0.9                                     | 160±5     | 20.0±0.7  |
| 6  | 0                                       | 160                  | 0.275          | 21.0±0.8                                     | 56±2      | 4.6±0.2   |
| 6  | 0.25                                    | 160                  | 0.525          | 30.0±1.0                                     | 300±10    | 18.0±0.5  |
| 9  | 0.1                                     | 80                   | 0.15           | 17.0±0.7                                     | 139±3     | 8.0±0.3   |
| 6  | 0.25                                    | 0                    | 0.275          | 0                                            | 0         | 0         |
| 9  | 0.1                                     | 80                   | 0.4            | 29.0±0.8                                     | 289±9     | 16.5±0.7  |
| 3  | 0.1                                     | 80                   | 0.4            | 25.0±0.8                                     | 275±9     | 17.9±0.4  |
| 9  | 0.1                                     | 240                  | 0.15           | 18.0±0.5                                     | 131±6     | 5.2±0.2   |
| 9  | 0.4                                     | 240                  | 0.15           | 20.0±0.6                                     | 184±6     | 8.4±0.5   |
| 6  | 0.25                                    | 320                  | 0.275          | 22.0±0.7                                     | 280±9     | 13.2±0.2  |
| 3  | 0.4                                     | 240                  | 0.15           | 18.0±0.7                                     | 170±4     | 6.0±0.4   |
| 3  | 0.1                                     | 240                  | 0.4            | 30.0±1.0                                     | 127±2     | 12.2±0.5  |
| 3  | 0.1                                     | 240                  | 0.15           | 16.0±0.9                                     | 150±9     | 3.20±0.05 |

**Table S3.** Metals recovery assay for different commodities with KR and DLLME. All values are percentual (%)

| Sample    | KR     |        |        | DLLME   |         |
|-----------|--------|--------|--------|---------|---------|
|           | Cd     | Pb     | As     | Cd      | Pb      |
| Mussel    | 86 ± 4 | 89 ± 5 | 98 ± 4 | 98 ± 3  | 97 ± 5  |
| Chocolate | 97 ± 7 | 87 ± 5 | 97 ± 7 | 101 ± 4 | 98 ± 5  |
| Rice      | 90 ± 4 | 79 ± 6 | 97 ± 5 | 98 ± 6  | 102 ± 5 |
| Wine      | 93 ± 5 | 97 ± 2 | 96 ± 5 | 98 ± 3  | 99 ± 5  |

Recovery (%) =  $100 \times [(\text{found} - \text{initial}) / \text{added}]$

**Table S4.**

Elemental analysis of the mussel sample by means of ICP-based techniques. ICP-OES experimental conditions:  $Q_g$ : 0.7 L min<sup>-1</sup>;  $Q_l$ : 0.4 mL min<sup>-1</sup>.

| Element   | Concentration (mg kg <sup>-1</sup> ) |               |           |
|-----------|--------------------------------------|---------------|-----------|
|           | KR-ICP-OES                           | DLLME-ICP-OES | ICP-MS    |
| <b>As</b> | -                                    | 10.3±0.3      | 10.5±0.4  |
| <b>Cd</b> | 3.8±0.8                              | 3.4±0.3       | 3.2±0.3   |
| <b>Pb</b> | <LOD                                 | 0.40±0.05     | 0.30±0.01 |

**Table S5.** As, Cd and Pb maximum allowed levels in several foods according to EU 1881/2006 policy and theoretical LODs for KR- and DLLME-ICP-OES considering an acid digestion treatment of 0.5 g sample and dilution up to 25 mL.

| Element | Food                                                                                                                                                  | Maximum allowed level ( $\mu\text{g kg}^{-1}$ ) | LOD ( $\mu\text{g kg}^{-1}$ ) |       |
|---------|-------------------------------------------------------------------------------------------------------------------------------------------------------|-------------------------------------------------|-------------------------------|-------|
|         |                                                                                                                                                       |                                                 | KR                            | DLLME |
| As      | Pancakes, wafers, cookies and rice cakes                                                                                                              | 300                                             |                               |       |
|         | Rice destined for the production of food for infants and young children                                                                               | 100                                             | -----                         | 150   |
|         | Honey                                                                                                                                                 | 100                                             |                               |       |
|         | Food complement                                                                                                                                       | 3000                                            |                               |       |
|         | Fats and oils including milk fat                                                                                                                      | 100                                             |                               |       |
|         | Meat (excluding offal) of bovine animals, sheep, pigs and poultry                                                                                     | 100                                             |                               |       |
|         | offal of cattle, sheep, pigs and poultry                                                                                                              | 500                                             |                               |       |
|         | crustaceans                                                                                                                                           | 500                                             |                               |       |
|         | cephalopods                                                                                                                                           | 300                                             |                               |       |
|         | Cereals and dried vegetables                                                                                                                          | 200                                             |                               |       |
| Pb      | Sweet corn and fruits excluding cranberries, strawberry trees, currants and elderberries                                                              | 100                                             | 200                           | 80    |
|         | blueberries, strawberry trees, currants and elderberries                                                                                              | 200                                             |                               |       |
|         | Vegetables                                                                                                                                            | 100-300                                         |                               |       |
|         | Raw milk, thermally treated milk and milk for the manufacture of dairy products                                                                       | 20                                              |                               |       |
|         | Preparations for infants and young children: powder and liquid                                                                                        | 50, 10                                          |                               |       |
|         | Foods for special medical purposes intended specifically for infants and young children: powder and liquid form                                       | 50, 30                                          |                               |       |
|         | Drinks for children and young children sold. Marketed liquid or to be reconstituted following the manufacturer's instructions, including fruit juices | 30                                              |                               |       |

|    |                                                                                                                                                                                                       |      |     |    |
|----|-------------------------------------------------------------------------------------------------------------------------------------------------------------------------------------------------------|------|-----|----|
|    | Cereals excluding wheat and rice                                                                                                                                                                      | 100  |     |    |
|    | Grains of wheat and rice                                                                                                                                                                              |      |     |    |
|    | Wheat bran and wheat germ for direct consumption                                                                                                                                                      | 200  |     |    |
|    | Soybeans                                                                                                                                                                                              |      |     |    |
|    | Vegetables and fruits excluding root and tuber vegetables, leafy vegetables, fresh herbs, brassica vegetables, young stems, mushrooms and seaweed                                                     | 50   |     |    |
|    | Root and tuber vegetables (excluding celeries, chirivias, salsifies and rustica radishes), young stems (celery excluded).                                                                             | 100  |     |    |
|    | Leafy vegetables, free herbs, vegetables of the Brassica genus, celery, celeriac, chirivias, salsifies, rustic radishes and the following mushrooms: mushrooms, oyster mushroom and shiitake mushroom | 200  |     |    |
|    | Milk chocolate with a total dry matter content of cocoa > 30                                                                                                                                          | 100  |     |    |
| Cd | Chocolate with a total cocoa dry matter content <50; milk chocolate with a total dry matter content of cocoa ≥30%                                                                                     | 300  | 100 | 30 |
|    | Chocolate with a total dry matter content of cocoa ≥50%                                                                                                                                               | 500  |     |    |
|    | Bivalve mollusks and cephalopods                                                                                                                                                                      | 1000 |     |    |
|    | anchovy, swordfish and sardine fish                                                                                                                                                                   | 250  |     |    |
|    | Melva fish                                                                                                                                                                                            | 150  |     |    |
|    | Food supplements composed exclusively of dried seaweed, products made from seaweed or dried bivalve mollusks                                                                                          | 3000 |     |    |
|    | Preparations for infants and continuation preparations:                                                                                                                                               |      |     |    |
|    | Powdered preparations for infant formulated from proteins obtained from cow's milk                                                                                                                    | 10   |     |    |
|    | Prepared in liquid for lactating persons based on proteins obtained from cow's milk                                                                                                                   | 5    |     |    |
|    | Prepared powders for lactated elaborated from isolated soy proteins alone or mixed with milk protein                                                                                                  |      |     |    |
|    | Prepared in liquid for lactating children prepared from isolated soy proteins alone or mixed with milk protein                                                                                        | 20   |     |    |
|    |                                                                                                                                                                                                       | 10   |     |    |

**Fig. S1.** Influence of the supramolecular:acetic acid mixture ratio on the integrated emission signal of Cd II 214.439 nm. ICP-OES operating conditions:  $Q_g$ : 0.7 L  $\text{min}^{-1}$ ;  $Q_j$ : 0.4 mL  $\text{min}^{-1}$ . Analyte concentration: 1 mg  $\text{L}^{-1}$ .

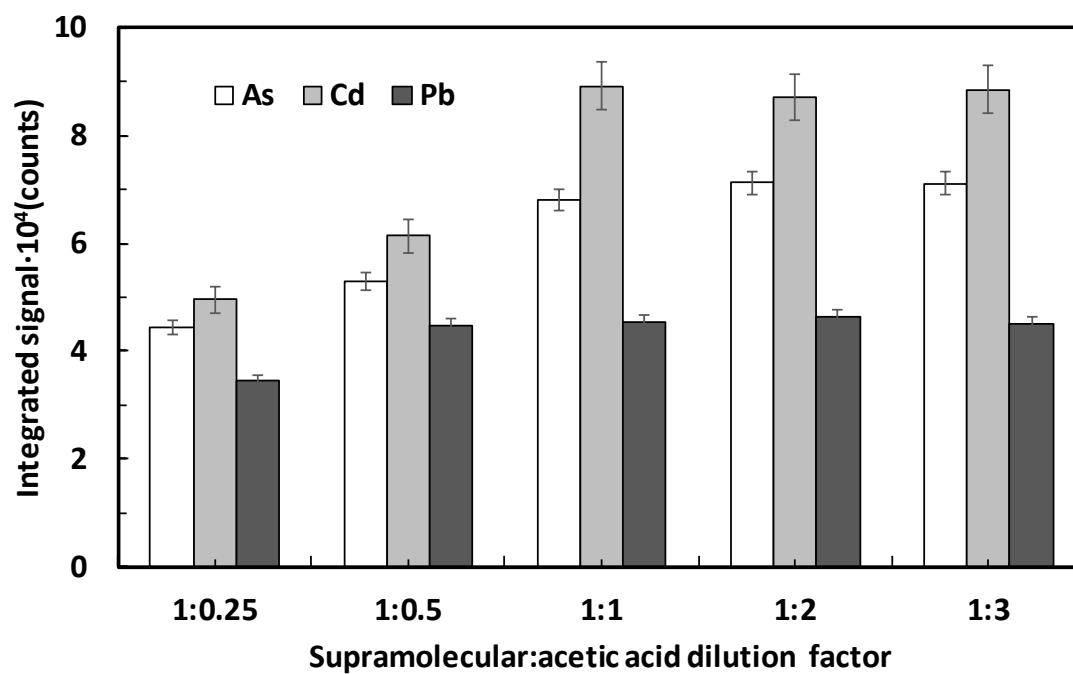

**Fig. S2.** Influence of the nebulizer gas flow rate on Cd II 214.439 nm integrated emission signal using a 1:1 supramolecular:acetic acid mixture at different  $Q_f$ .

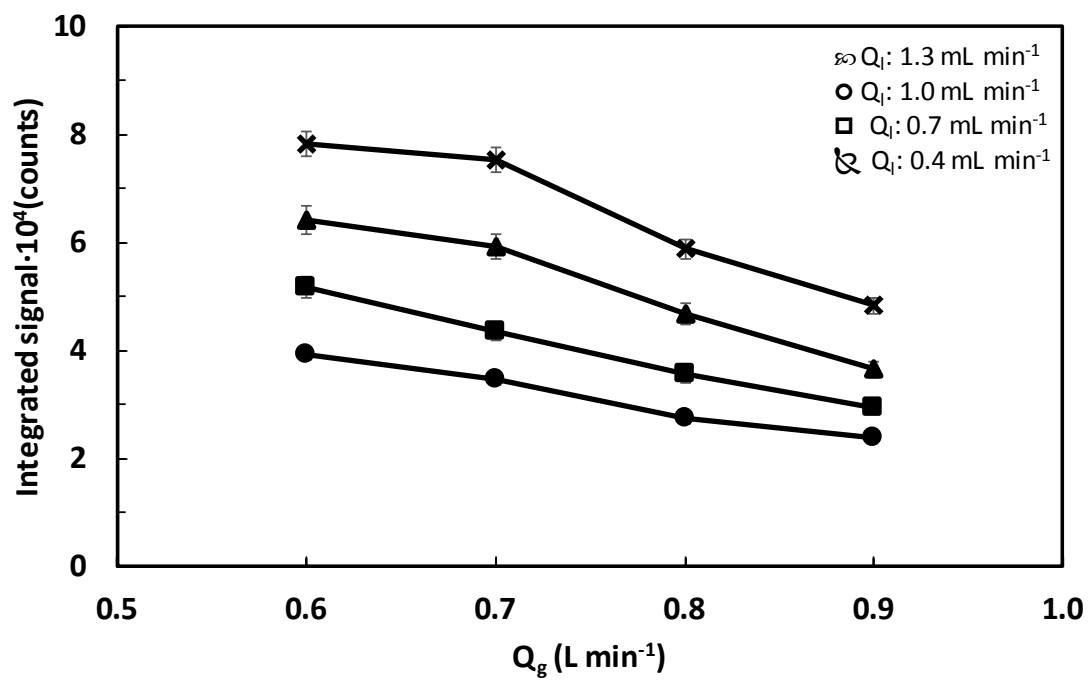

Supplement: c9ja00427k1.pdf [file c9ja00427k1.pdf]
